# Supplementary material for: The Genome of Spraguea lophii and the Basis of Host-Microsporidian Interactions
Source: PLoS Genet. 2013 Aug 22;9(8):e1003676. doi: 10.1371/journal.pgen.1003676 (PMC3749934; doi:10.1371/journal.pgen.1003676)
Supplement: Table S1 — Presence and absence of enzymes in selected metabolic pathways in our S. lophii genome survey and across Microsporidia. Table expanded from Keeling et al [21]. (XLSX) [file pgen.1003676.s005.xlsx]

## Sheet: Sheet1
Metabolic Pathways	S. lophii	S. lophii ID	T.hominis ORFs	Encephalitozoon cuniculi	Antonospora locustae	A. locustae contig	Octosporea bayeri	O. bayerii contigs	Nosema ceranae	N. ceranae Accession	Enterocytozoon bieneusi - Sanger	Enterocytozoon bieneusi - 454
Glycolysis			Glycolysis
Pyruvate kinase	Present	SLOPH 1533 Contig 9471	frameshift(orf_1102 , orf_1103)	ECU09_0640	Present	493	Present	ACSZ01010341	Present	EEQ82843	Absent	Absent
Enolase ( phosphopyruvate hydratase)	Present	SLOPH 2310 Contig 13259	orf_1140	ECU10_1690	Present	489	Present	ACSZ01011480	Present	EEQ81707	Absent	Absent
Fructose 1,6-bisphosphate aldolase	Present	SLOPH 377 Contig 2031	orf_689	ECU01_0240	Present	298	Present	ACSZ01001028	Present	EEQ82977	Absent	Absent
Phosphoglycerate mutase	Present	SLOPH 1438 Contig 5443	orf_17	ECU10_1060	Present	90	Present	ACSZ01010746	Present	EEQ82117	Absent	Absent
Hexokinase	Present	SLOPH 2309 Contig 13259	orf_1847, orf_443, orf_898, orf_937	ECU11_1540	Present	1358	Present	ACSZ01003327	Present	EEQ82213	Absent	Absent
pyruvate DHase E1, a sub (ODPA SCHPO)	Absent	Absent	orf_3152	ECU09_1040	Present	369	Present	ACSZ01010560	Present	EEQ82465	Absent	Absent
pyruvate DHase E1, b sub (ODPB RICPR)	Absent	Absent	orf_2525	ECU04_1160	Present	369	Present	ACSZ01018105	Present	EEQ81634	Absent	Absent
phosphofructokinase	Present	SLOPH 1429 Contig 429	orf_3303	ECU03_0680	Present	368	Present	ACSZ01004074	Present	EEQ81249	Absent	Absent
phosphoglucose isomerase	Present	SLOPH 2363 Contig 13990	orf_290	ECU05_0650	Present	2954, 894	Present	ACSZ01012918	Present	EEQ82374	Absent	Absent
3-phosphoglycerate kinase	Present	SLOPH 1437 Contig 893	orf_1961	ECU05_0320	Present	306	Present	ACSZ01003548	Present	EEQ81655	Absent	Absent
Glyceraldehyde-3-phosphate dehydrogenase	Present	SLOPH 399 Contig 5573	orf_1964	ECU07_0800	Present	235	Present	ACSZ01003401	Present	EEQ81890	Present	Present
Triose phosphate isomerase	Present	SLOPH 1996 Contig 12962	orf_2649	ECU11_0230	Present	27	Present	ACSZ01010570	Present	EEQ83169	Absent	Absent
Pentose Phosphate pathway			Pentose Phosphate pathway
glucose-6-P 1-DHase (G6PD yeast)	Present	SLOPH 391 Contig 15507	orf_766, orf_769	ECU08_1850	Present	584	Present	ACSZ01002550	Present	EEQ83122	Present	Present
6-phosphogluconate dehydrogenase	Present	SLOPH 50 Contig 7858	frameshift(orf_1307, orf_1308)	ECU05_0860	Present	462	Present	ACSZ01001094	Present	EEQ82207	Absent	Absent
Transketolase 1	Present	SLOPH 1976 Contig 2577	orf_43	ECU06_0120	Present	886	Present	ACSZ01014931	Present	EEQ82390	Absent	Absent
D-ribulose-5-P 3-isomerase	Present	SLOPH 1563 Contig 7731	orf_797	ECU10_0180	Absent	N.A.	Present	ACSZ01002511	Present	EEQ81475	Absent	Absent
D-ribulose-5-P 3-epimerase	Present	SLOPH 1577 Contig 14578	orf_3287	ECU06_1040	Present	1125, 306, 2920	Present	ACSZ01001191	Present	EEQ82884	Absent	Absent
Additional from T.hominis annotation
glucose 1-dehydrogenase	Absent	Absent	orf_1224	Absent
6-phosphogluconolactonase	Present	SLOPH 51 Contig 15878	orf_2068	ECU04_0730
Trehalose metabolism			Trehalose metabolism
Neutral Trehalase	Present	SLOPH 2449 Contig 10904	orf_3221, orf_1246	ECU02_1370	Present	346	Present	ACSZ01004260	Present	EEQ81165	Absent	Absent
Trehalose-6-phosphate synthase	Present	SLOPH 1995 Contig2850	orf_388	ECU01_0870	Present	222, 481,	Present	ACSZ01025097	Present	EEQ82952	Absent	Absent
Trehalose phosphatase	Present	SLOPH 2338 Contig 1584	orf_3285	ECU01_0800	Present	346	Present	ACSZ01007542	Present	EEQ82947	Absent	Absent
UTP-glucose-1-P uridylyltransferase	Present	SLOPH 2044 Contig 918	orf_1437	ECU03_0280	Present	17	Present	ACSZ01002054	Present	EEQ82591	Absent	Absent
Fatty Acids Biosynthesis			Fatty Acids Biosynthesis
1-Acyl-sn-Glycerol-3-phosphate Acyltransferase 1	Present	SLOPH 4 Contig 8546	orf_3269	ECU10_0310	Present	705	Present	ACSZ01001113	Present	EEQ83131	Present	Present
1-Acyl-sn-Glycerol-3-phosphate Acyltransferase 2	Present	SLOPH 3 Contig 4159	orf_1528	ECU04_1280	Present	559	Present	ACSZ01010428	Present	EEQ83012	Present	Present
1-Acyl-sn-Glycerol-3-P acylTase Acyltransferase 3	Present	SLOPH 3 Contig 4159	orf_193 , orf_200	ECU10_1260	Present	705, 559	Present	ACSZ01002355	Present	EEQ83012	Present	Present
Diacylglycerol Ethanolamine phosphotransferase	Present	SLOPH 193 Contig 879	orf_2194	ECU11_0620	Present	2979	Present	ACSZ01003547	Present	EEQ82067	Absent	Absent
3-hydroxy-3-methylglutaryl-CoA Reductase	Absent	Absent	Absent	ECU10_1720	Present	106	Present	ACSZ01003035	Present	EEQ82533	Absent	Absent
3-hydroxy-3-methylglutaryl-CoA Synthase	Absent	Absent	Absent	ECU10_0510	Present	1388	Present	ACSZ01004130	Present	EEQ82871	Absent	Absent
CDP-diacylglycerol insitol-3-phosphatidyltransferase	Present	SLOPH 2224 Contig 3186	orf_1135, orf_2592	ECU01_1000	Present	1388	Present	ACSZ01033120	Present	EEQ81975	Absent	Absent
CDP diacylglycerol Serine o-Phosphatidyltransferase	Present	SLOPH 1443 Contig 2298	orf_1829	ECU11_0850	Absent	N.A.	Present	ACSZ01001973	Present	EEQ81516	Absent	Present
CDP-DAG synthase	Present	SLOPH 1430 Contig 14282	orf_2447	ECU05_1250	Present	1388	Present	ACSZ01001726	Present	EEQ82771	Present	Present
Phosphorylcholine transferase	Present	SLOPH 206 Contig 2860	orf_476, orf_3150	ECU10_1590	Present	513	Present	ACSZ01000622	Present	EEQ81488	Absent	Absent
Farnesyl Pyrophosphate Synthetase	Absent	Absent	Absent	ECU11_1810	Present	809	Present	ACSZ01000244	Present	EEQ81602	Absent	Absent
Isopentenyl-diphosphate delta - isomerase	Absent	Absent	Absent	ECU02_0230	Present	458	Present	ACSZ01004634	Present	EEQ81856	Absent	Absent
Long-chain-fatty-acid-CoA ligase	Present	SLOPH 1331 Contig 21101	orf_2271, orf_708	ECU10_0890	Present	667	Present	ACSZ01000294	Present	EEQ82049	Present	Present
Mevalonate kinase	Absent	Absent	Absent	ECU09_1780	Present	1219	Present	ACSZ01000168	Present	EEQ82278	Absent	Absent
Similar to mevalonate kinase	Absent	Absent	Absent	ECU10_1510	Present	211	Present	ACSZ01006457	Present	EEQ82004	Absent	Absent
Mevalonate-PP decarboxylase	Absent	Absent	Absent	ECU06_0490	Present	220	Present	ACSZ01002014	Absent	N.A.	Absent	Absent
N-acetylglucosaminyl-phosphatidylinositol biosynthetic protein	Present	SLOPH 2303 Contig 24087	Absent	ECU09_1210	Present	327	Present	ACSZ01001506	Present	EEQ81971	Absent	Absent
Serine palmitoyltransferase	Present	SLOPH 1619 Contig 6125	orf_622	ECU02_0860	Present	1388	Present	ACSZ01018535	Present	EEQ82839	Absent	Absent
serine palmitoyl Tase, sub 2 (LCB2 HUMAN)	Present	SLOPH 1618 Contig 5443	orf_1335	ECU05_0730	Present	0	Present	ACSZ01007668	Present	EEQ82468	Absent	Absent
sterol ester Tase (AREH SCHPO)	Present	SLOPH 1529 Contig 2115	orf_3270	ECU10_0300	Present	705	Present	ACSZ01012210	Present	EEQ83129	Absent	Absent
Transcriptional control			Transcriptional control
antagonizes telomeric silencing (SIF2 yeast)	Present	SLOPH 1975 Contig 5459	Absent	ECU01_0980	Present	162	Present	ACSZ01013350.1	Present	EEQ81643	Present	Present
anti-silencing prt 1 (ASF1 yeast)	Present	SLOPH 141 Contig 6622	orf_2359	ECU07_0130	Present	51	Present	ACSZ01008113	Present	EEQ82554	Present	Present
carbone catabolite repressor 4 (CCR4 yeast)	Present	SLOPH 2621 Contig 4612	orf_2051	ECU11_0770	Present	756	Present	ACSZ01000909	Present	EEQ82814	Present	Present
CCAAT-binding transcription factor, sub A (CBFA MAIZE)	Present	SLOPH 188 Contig 2115	orf_2897	ECU10_0260	Present	704	Present	ACSZ01000721	Present	EEQ83142	Present	Present
CCAAT-binding factor sub (HAP5 yeast)	Present	SLOPH 189 Contig 8209	orf_2543	ECU05_0450	Present	452	Present	ACSZ01020335	Present	EEQ81990	Present	Present
CCR4-associated transcription factor (CAF1 MOUSE)	Present	SLOPH 190 Contig 3933	orf_1289	ECU08_0850	Present	1302	Present	ACSZ01004267	Present	EEQ82096	Present	Present
GAL4 DNA-binding enhancer prt 2 (EGD2 yeast)	Present	SLOPH 2017 Contig 5432	Absent	ECU02_1050	Present	1123	Present	ACSZ01000535	Absent	N.A.	Present	Present
GATA-type transcription factor (GAF1 SCHPO)	Present	SLOPH 387 Contig 1425	orf_3163	ECU08_1400	Present	1071	Present	ACSZ01027063	Present	EEQ83037	Present	Present
GATA zinc-finger transcription factor 3 (GAT1 HUMAN)	Present	SLOPH 385 Contig 6008	orf_2157	ECU02_0260	Present	220	Present	ACSZ01006913	Present	EEQ81349	Present	Present
general negative regulator of transcription, sub 1 (NOT1 yeast)	Present	SLOPH 1398 Contig 1728	orf_398	ECU11_1370	Present	489	Present	ACSZ01001194	Present	EEQ82398	Present	Present
general negative regulator of transcription, sub 2 (NOT2 yeast)	Present	SLOPH 1399 Contig 3119	orf_807	ECU01_1040	Present	298	Present	ACSZ01009828	Present	EEQ81984	Present	Present
general transcription factor (BDF1 yeast)	Present	SLOPH 1958 Contig 4984	orf_1445	ECU08_1640	Present	3	Present	ACSZ01010599	Present	EEQ81389	Present	Present
general transcriptional adaptator (ADA2 yeast)	Present	SLOPH 1974 Contig 2683	orf_1008	ECU04_0230	Present	520	Present	ACSZ01011147	Present	EEQ82701	Present	Present
global transcriptional activator, SNF2/RAD54 fam (SN21 HUMAN)	Present	SLOPH 1895 Contig 892	orf_1155	ECU09_1890	Present	27	Present	ACSZ01022498	Present	EEQ82763	Present	Present
heat-shock transcription factor (HSF KLULA)	Present	SLOPH 314 Contig 1377	orf_1652	ECU04_0400	Present	417	Present	ACSZ01017822	Present	EEQ83147	Present	Present
heat-shock transcription factor (HSF2 LYCPE)	Present	SLOPH 419 Contig 13279	orf_75	ECU08_0970	Present	175	Present	ACSZ01001085	Present	EEQ81818	Present	Present
histone deacetylase 1 (HDA1 CHICK)	Present	SLOPH 425 Contig 3620	orf_221	ECU03_1370	Present	298	Present	ACSZ01009517	Present	EEQ82784	Present	Present
histone deacetylase 3 (HDA3 CHICK)	Present	SLOPH 426 Contig 2478	orf_595	ECU09_0670	Present	212	Present	ACSZ01030865	Present	EEQ82841	Present	Present
histone transcription regulator (HIRL SCHPO)	Present	SLOPH 434 Contig 5166	orf_2722	ECU02_0710	Present	517	Present	ACSZ01000035	Present	EEQ82956	Present	Present
removes TBP from the TATA box, SNF2/RAD54 fam (MOT1 yeast)	Present	SLOPH 421 Contig 608	orf_737	ECU03_1530	Present	61	Present	ACSZ01034079	Present	EEQ83063	Present	Present
ring zinc finger transcriptional negative regulator (YAC4 SCHPO)	Present	SLOPH 2430 Contig 13661	orf_2909	ECU11_1660	Present	34	Present	ACSZ01009019	Present	EEQ83107	Present	Present
similarity to enhancer of zeste prt (EZ DROME)	Present	SLOPH 1792 Contig 1922	orf_1663	ECU09_1750	Present	511	Present	ACSZ01013981	Present	EEQ82986	Present	Present
similarity to suppressor of forked prt (SUF DROME)	Present	SLOPH 1792 Contig 1922	orf_678	ECU02_0930	Present	162	Present	ACSZ01007671	Present	EEQ82986	Present	Present
SIR2-like silencing prt (HST4 yeast)	Present	SLOPH 1886 Contig 250	orf_2231	ECU03_0460	Present	20	Present	ACSZ01007407	Present	EEQ81900	Absent	Absent
TAU-like transcription factor (TFC4 yeast)	Present	SLOPH 1653 Contig 2501	orf_2646	ECU08_0840	Present	1388	Present	ACSZ01012570	Present	EEQ82093	Present	Present
TBP-associated phosphoprotein (TBAP HUMAN)	Present	SLOPH 1935 Contig 2715	orf_716	ECU11_0730	Present	755	Present	ACSZ01007238	Present	EEQ81613	Present	Present
transcription factor (STE12 CANAL)	Present	SLOPH 1962 Contig 6347	orf_2765	ECU11_2030	Present	567	Present	ACSZ01004576	Present	EEQ82283	Present	Present
transcription factor (FKH2 yeast)	Present	SLOPH 371 Contig 3519	orf_1369	ECU01_0470	Present	348	Present	ACSZ01014509	Present	EEQ81766	Present	Present
transcription factor (FXJ1 HUMAN)	Present	SLOPH 371 Contig 3519	orf_3093	ECU11_1330	Present	543	Present	ACSZ01030631	Present	EEQ82040	Present	Present
transcription factor, MYB-type (MYBH DICDI)	Present	SLOPH 1375 Contig 882	orf_1482	ECU06_1020	Present	1358	Present	ACSZ01003089	Absent	N.A.	Present	Present
transcription factor, MYB-type (BAS1 yeast)	Present	SLOPH 1920 Contig 3033	Absent	ECU05_0350	Present	894	Present	ACSZ01017318	Present	EEQ82647	Present	Present
transcription factor, put (SRF XENLA)	Present	SLOPH 1335 Contig 236	orf_1181	ECU07_1740	Present	175	Present	ACSZ01004258	Present	EEQ81341	Absent	Absent
transcription factor, TALE/PBX fam (HM20 CAEEL)	Present	SLOPH 1933 Contig 2643	Absent	ECU10_1480	Present	1102	Present	ACSZ01024281	Present	EEQ82021	Absent	Absent
transcriptional activator (BTE1 HUMAN)	Present	SLOPH 1880 Contig 3489	orf_298	ECU05_0610	Present	894	Present	ACSZ01009713	Present	EEQ81784	Present	Present
transcriptional activator (GCN5 yeast)	Present	SLOPH 167 Contig 6962	orf_1673	ECU10_1430	Present	1403	Present	ACSZ01011457	Present	EEQ82638	Present	Present
transcriptional activator (LMXA MESAU)	Present	SLOPH 446 Contig 7655	orf_497	ECU03_1170	Present	159	Present	ACSZ01013966	Present	EEQ83007	Present	Present
transcriptional regulation mediator (MED6 yeast)	Present	SLOPH 2315 Contig 11882	orf_2799	ECU01_0500	Present	348	Present	ACSZ01033440	Present	EEQ81918	Present	Present
transcriptional regulator (BR14 HUMAN)	Present	SLOPH 2284 Contig 13284	orf_2790	ECU09_1850	Absent	N.A.	Present	ACSZ01002257	Present	EEQ82046	Absent	Absent
transcriptional regulator-like prt (SIN3 yeast)	Present	SLOPH 427 Contig 2376	orf_1845	ECU11_0190	Absent	N.A.	Present	ACSZ01005937	Present	EEQ83161	Present	Present
transcriptional repressor (TUP1 CANAL)	Absent	Absent	orf_1544	ECU02_0640	Absent	N.A.	Present	ACSZ01019083	Present	EEQ81941	Absent	Absent
transcriptional repressor (NCB1 yeast)	Present	SLOPH 435 Contig 290	orf_1475	ECU11_1470	Present	462	Present	ACSZ01005448	Absent	N.A.	Present	Present
zinc finger prt (GLO3 yeast)	Present	SLOPH 2086 Contig 446	orf_2221	ECU08_1690	Present	106	Present	ACSZ01004980	Present	EEQ81906	Present	Present
zinc finger prt (GLO3 yeast)	Present	SLOPH 112 Contig 4702	orf_3054	ECU11_0550	Present	756	Present	ACSZ01014678	Present	EEQ81756	Present	Present
zinc finger prt involved in transcriptional regulation (Z229 HUMAN)	Absent	Absent	orf_3147	ECU03_0790	Present	366	Present	ACSZ01000447	Absent	N.A.	Present	Present
60S ribosomal proteins			60S ribosomal proteins
acidic ribosomal prt P0 (A0) (RLA0 yeast)	Present	SLOPH 53 Contig 3517	orf_1963	ECU07_0820	Present	839	Present	ACSZ01012365	Present	EEQ81793	Present	Present
acidic ribosomal prt P0, w.sim (RLA0 ARCFU)	Absent	Absent	Absent	ECU05_0470	Absent	N.A.	Absent	N.A.	Present	EEQ82590	Present	Present
acidic ribosomal prt P2 (A4) (RLA4 SCHPO)	Present	SLOPH 54 Contig 3446	orf_2350	ECU07_0110	Absent	N.A.	Present	ACSZ01008294	Absent	N.A.	Present	Present
ribosomal prt L44 (RL44 ARATH)	Present	SLOPH 74 Contig 1894	orf_199	ECU10_1300	Present	401	Present	ACSZ01009637	Absent	N.A.	Present	Present
ribosomal prt L39 (RL39 DROME)	Present	SLOPH 2202 Contig 3689	orf_3301	ECU09_0395	Present	1388	Present	ACSZ01023584	Absent	N.A.	Absent	Present
ribosomal prt L37 (RL37 SCHMA)	Present	SLOPH 2713 Contig 4360_1	orf_1107	ECU07_1460	Present	214	Present	ACSZ01031852	Absent	N.A.	Present	Present
ribosomal prt L37A (L43) (R37A PLAFA)	Present	SLOPH 2590 Contig 8262	orf_1577	ECU07_1005	Present	615	Present	ACSZ01014313	Present	EEQ82713	Present	Present
ribosomal prt L36 (R36A yeast)	Present	SLOPH 72 Contig 234	orf_620	ECU06_1120	Present	1388	Present	ACSZ01010858	Absent	N.A.	Present	Present
ribosomal prt L35 (RL35 SCHPO)2	Present	SLOPH 2194 Contig 18615	orf_1132	ECU07_1820	Present	2779	Present	ACSZ01018163	Present	82341	Present	Absent
ribosomal prt L35 (RL35 SCHPO)2	Present	SLOPH 2194 Contig 18615	orf_1132	ECU11_2060	Present	2779	Present	ACSZ01018163	Present	EEQ82341	Present	Absent
ribosomal prt L35, w.sim (RL35 SCHPO)2	Present	SLOPH 2194 Contig 18615	orf_1132	ECU10_0070	Present	2779	Present	ACSZ01018163	Present	EEQ82341	Present	Absent
ribosomal prt L35A (L33) (R35A CAEEL)	Present	SLOPH 71 Contig 10505	orf_1516	ECU02_0900	Present	162	Present	ACSZ01005729	Absent	N.A.	Present	Present
ribosomal prt L34 (RL34 AEDAL)	Present	SLOPH 1567 Contig 6125	orf_2995	ECU03_0710	Present	1128	Present	ACSZ01017097	Present	EEQ82256	Present	Present
ribosomal prt L32 (RL32 HUMAN)	Present	SLOPH 70 Contig 2643	orf_375	ECU04_1310	Present	559	Present	ACSZ01025214	Present	EEQ82989	Present	Present
ribosomal prt L31 (RL31 yeast)	Present	SLOPH 2196 Contig 271	Absent	ECU03_0230	Present	27	Present	ACSZ01025214	Present	EEQ81666	Present	Present
ribosomal prt L30 (RL30 MAIZE)	Present	SLOPH 69 Contig 412	orf_302	ECU05_1490	Present	298	Present	ACSZ01003778	Present	EEQ82514	Present	Present
ribosomal prt L27 (RL27 SOLTU)	Present	SLOPH 66 Contig 3081	orf_452	ECU04_0330	Present	298	Present	ACSZ01000476	Present	EEQ82796	Present	Present
ribosomal prt L27A (L28) (R27A ENCCU)	Present	SLOPH 67 Contig 2255	orf_2277	ECU10_0990	Present	401	Present	ACSZ01011285	Present	EEQ82023	Present	Present
ribosomal prt L26 (RL26 CHICK)	Present	SLOPH 65 Contig 4515	orf_1893	ECU08_0370	Present	102	Present	ACSZ01012051	Present	EEQ82560	Present	Present
ribosomal prt L24 (RL24 CAEEL)	Present	SLOPH 2195 Contig 271	orf_2300	ECU02_0810	Present	3	Absent	N.A.	Present	EEQ82725	Present	Present
ribosomal prt L24 (RL24 KLULA)	Present	SLOPH 2195 Contig 271	orf_1131	ECU07_0930	Present	1173	Absent	N.A.	Present	EEQ82725	Present	Present
ribosomal prt L23 (RL23 HUMAN)	Present	SLOPH 2233 Contig 1215	orf_2336	ECU08_1160	Present	129	Present	ACSZ01008892	Present	EEQ82397	Present	Present
ribosomal prt L23A (L25) (RL2B FRIAG)	Present	SLOPH 64 Contig 15878	Absent	ECU10_0160	Present	584	Present	ACSZ01003982	Absent	N.A.	Present	Present
ribosomal prt L23A (L25) (RL23 PYRHO)	Present	SLOPH 64 Contig 15878	Absent	ECU08_1910	Present	584	Present	ACSZ01003982	Absent	N.A.	Present	Present
ribosomal prt L22 (RL22 TRIGR)	Present	SLOPH 63 Contig 10929	orf_3137	ECU04_0740	Absent	N.A.	Present	ACSZ01018326	Present	EEQ81139	Present	Present
ribosomal prt L21 (RL21 CAEEL)	Present	SLOPH 62 Contig 4161	orf_2952	ECU05_0900	Present	695	Present	ACSZ01005500	Present	EEQ82204	Present	Present
ribosomal prt L19 (RL19 MOUSE)	Present	SLOPH 60 Contig 3500	Absent	ECU06_1080	Present	289	Present	ACSZ01018751	Present	EEQ82882	Present	Present
ribosomal prt L18 (RL18 XENLA)	Present	SLOPH 59 Contig 6038	orf_2822	ECU03_1490	Present	289	Present	ACSZ01018353	Present	EEQ83048	Present	Present
ribosomal prt L18A (L20) (RL20 yeast)	Present	SLOPH 61 Contig 6144	orf_2671	ECU08_0600	Absent	N.A.	Present	ACSZ01015690	Present	EEQ82287	Present	Present
ribosomal prt L17 (RL17 RAT)	Present	SLOPH 58 Contig 1008	orf_2885	ECU07_1410	Present	214	Present	ACSZ01010667	Present	EEQ81482	Present	Present
ribosomal prt L15 (RL15 CHITE)	Present	SLOPH 1565 Contig 6442	orf_65	ECU11_1380	Present	604	Present	ACSZ01006400	Present	EEQ82042	Present	Present
ribosomal prt L13 (RL13 CANAL)	Present	SLOPH 32 Contig 918	orf_2296	ECU03_0320	Present	16	Present	ACSZ01016592	Present	EEQ81895	Present	Present
ribosomal prt L13A (L16) (R16C SCHPO)	Present	SLOPH 1564 Contig 2643	orf_374	ECU04_1380	Present	559	Present	ACSZ01000597	Present	EEQ81703	Present	Present
ribosomal prt L12 (RL12 SCHPO)	Present	SLOPH 57 Contig 2564	orf_1836	ECU08_2010	Present	170	Present	ACSZ01018541	Present	EEQ83162	Present	Present
ribosomal prt L11 (RL11 DROME)	Present	SLOPH 56 Contig 4506	orf_1535	ECU02_0610	Present	219	Present	ACSZ01002718	Present	EEQ81669	Present	Present
ribosomal prt L10 (RL10 HUMAN)	Present	SLOPH 1601 Contig 4222	orf_751	ECU08_1570	Present	298	Present	ACSZ01020883	Present	EEQ81194	Present	Present
ribosomal prt L10A (L1) (R10A RAT)	Present	SLOPH 55 Contig 8426	orf_1496	ECU05_0600	Present	759	Present	ACSZ01008150	Present	EEQ82932	Present	Present
ribosomal prt L9 (RL9 RAT)	Present	SLOPH 79 Contig 6377	orf_3097	ECU02_0800	Present	1173	Present	ACSZ01000558	Present	EEQ82726	Present	Present
ribosomal prt L8 (L2) (RL2 yeast)	Present	SLOPH 78 Contig 6826	orf_1446	ECU01_0310	Present	220	Present	ACSZ01022974	Absent	N.A.	Present	Present
ribosomal prt L7 (RL7C SCHPO)	Present	SLOPH 76 Contig 2811	orf_1564	ECU03_0950	Present	1032	Present	ACSZ01011643	Present	EEQ81880	Present	Present
ribosomal prt L7A (L8) (RL8B yeast)	Present	SLOPH 77 Contig 2811	orf_1566	ECU02_0750	Present	1236	Present	ACSZ01006876	Present	EEQ81382	Present	Present
ribosomal prt L6 (RL6A yeast)	Present	SLOPH 2210 Contig 12761	orf_162	ECU08_1780	Present	712	Present	ACSZ01019475	Present	EEQ83116	Present	Present
ribosomal prt L5 (RL5 CAEEL)	Present	SLOPH 75 Contig 5792	orf_282	ECU06_0900	Present	306	Present	ACSZ01024321	Present	EEQ82011	Present	Present
ribosomal prt L4 (RL4 TRYBB)	Present	SLOPH 73 Contig 2501	orf_2647	ECU08_0830	Present	877	Present	ACSZ01011106	Present	EEQ82548	Present	Present
ribosomal prt L3 (RL3 RAT)	Present	SLOPH 68 Contig 24689	orf_1038	ECU03_1220	Present	483	Present	ACSZ01020006	Present	EEQ83005	Present	Present
ribosomal prt L3 (RL3 yeast)	Present	SLOPH 68 Contig 24689	orf_1038	ECU09_1000	Present	483	Present	ACSZ01020006	Present	EEQ83005	Present	Present
40S ribosomal proteins			40S ribosomal proteins
ribosomal prt S30 (RS30 yeast)	Present	SLOPH 41 Contig 4057	orf_523	ECU10_1575	Present	36	Present	ACSZ01026573	Absent	N.A.	Present	Present
ribosomal prt S29 (RS29 HUMAN)	Present	SLOPH 2174 Contig 4269	Absent	ECU04_0125	Present	211	Present	ACSZ01022791	Absent	N.A.	Present	Present
ribosomal prt S28 (RS28 ARATH)	Present	SLOPH 2171 Contig 458	orf_609	ECU09_1275	Present	656	Present	ACSZ01000050	Absent	N.A.	Present	Present
ribosomal prt S27 (RS27 XENLA)	Present	SLOPH 38 Contig 6510	orf_3300	ECU04_1015	Present	589	Present	ACSZ01003415	Absent	N.A.	Present	Present
ribosomal prt S26 (RS26 NEUCR)	Present	SLOPH 1572 Contig 2455	orf_1595	ECU06_1445	Present	106	Present	ACSZ01025588	Present	EEQ82231	Absent	Present
ribosomal prt S25 (RS25 yeast)2	Present	SLOPH 1571 Contig 455	orf_2251	ECU08_1040	Present	509	Present	ACSZ01004061	Present	EEQ81273	Absent	Absent
ribosomal prt S25 (RS25 yeast)2	Present	SLOPH 1571 Contig 455	orf_2251	ECU08_1070	Present	509	Present	ACSZ01004061	Present	EEQ81273	Absent	Absent
ribosomal prt S24 (RS24 FUGRU)	Present	SLOPH 37 Contig 4057	Absent	ECU10_1570	Present	513	Present	ACSZ01008748	Present	EEQ81399	Present	Present
ribosomal prt S23 (RS23 BRUMA)	Present	SLOPH 2680 Contig 1001	orf_3123	ECU10_0400	Present	1326	Present	ACSZ01002333	Present	EEQ82660	Present	Present
ribosomal prt S20 (RS20 ORYSA)	Present	SLOPH 35 Contig 918	orf_3062	ECU11_0720	Present	1158	Present	ACSZ01023886	Present	EEQ81614	Present	Present
ribosomal prt S19 (R19E METJA)	Present	SLOPH 34 Contig 5411	orf_2932	ECU11_1620	Present	71	Present	ACSZ01008738	Present	EEQ83105	Present	Present
ribosomal prt S18 (RS18 HUMAN)	Present	SLOPH 33 Contig 4270	orf_2845	ECU06_1110	Present	306	Present	ACSZ01000133	Present	EEQ82888	Present	Present
ribosomal prt S17 (RS17 HUMAN)	Present	SLOPH 2153 Contig 5883	orf_629	ECU02_0770	Present	900	Present	ACSZ01031409	Present	EEQ81381	Present	Present
ribosomal prt S16 (RS16 LUPPO)	Present	SLOPH 2103 Contig 918	orf_2295	ECU03_0310	Present	16	Present	ACSZ01004490	Present	EEQ81896	Present	Present
ribosomal prt S15 (RS15 ARATH)	Present	SLOPH 1570 Contig 2039	orf_1895	ECU08_0350	Present	102	Present	ACSZ01008558	Present	EEQ82564	Present	Present
ribosomal prt S15A (S22) (RS22 yeast)	Present	SLOPH 31 Contig 2744	orf_240	ECU09_1350	Present	613	Present	ACSZ01022391	Present	EEQ81905	Present	Present
ribosomal prt S14 (RS14 SCHPO)	Present	SLOPH 30 Contig 9116	orf_926	ECU03_0650	Present	369	Present	ACSZ01013268	Present	EEQ81447	Present	Present
ribosomal prt S13 (RS13 BRUPA)	Present	SLOPH 29 Contig 455	orf_74	ECU08_1060	Present	510	Present	ACSZ01006059	Present	EEQ82393	Absent	Present
ribosomal prt S12 (RS12 XENLA)	Present	SLOPH 28 Contig 6075	orf_2408	ECU01_0920	Present	346	Present	ACSZ01019082	Present	EEQ81853	Absent	Absent
ribosomal prt S11 (RS11 yeast)	Present	SLOPH 27 Contig 3620	orf_229	ECU04_0640	Present	298	Present	ACSZ01018597	Present	EEQ82807	Present	Present
ribosomal prt S10 (RS10 SCHPO)	Present	SLOPH 26 Contig 2850	orf_394	ECU04_1355	Present	559	Present	ACSZ01009373	Absent	N.A.	Present	Present
ribosomal prt S9 (RS9 CAEEL)	Present	SLOPH 48 Contig 4161	orf_2953	ECU05_0920	Present	695	Present	ACSZ01012495	Present	EEQ82203	Present	Present
ribosomal prt S8 (RS8 SCHPO)	Present	SLOPH 47 Contig 10505	orf_459	ECU02_0880	Present	161	Absent	N.A.	Present	EEQ82498	Present	Present
ribosomal prt S7 (RS7 SCHPO)	Present	SLOPH 46 Contig 1989	orf_2054	ECU11_0780	Present	757	Present	ACSZ01002434	Present	EEQ82813	Present	Absent
ribosomal prt S6 (RS6 KLULA)	Present	SLOPH 45 Contig 1691	orf_2573	ECU05_0670	Present	785	Present	ACSZ01021479	Present	EEQ82371	Present	Present
ribosomal prt S5 (RS5 DROME)	Present	SLOPH 44 Contig 26929	orf_747	ECU04_0140	Present	783	Present	ACSZ01010590	Present	EEQ82833	Present	Present
ribosomal prt S4 (RS4 GOSHI)	Present	SLOPH 43 Contig 14616	orf_1278	ECU08_0870	Present	401	Present	ACSZ01018740	Present	EEQ82095	Present	Present
ribosomal prt S3 (RS3 yeast)	Present	SLOPH 40 Contig 5191	orf_597	ECU09_1250	Present	1096	Present	ACSZ01006674	Present	EEQ82690	Present	Present
ribosomal prt S3A (S1) (RS3A ORYZA)	Present	SLOPH 42 Contig 6856	orf_96	ECU05_0250	Present	1157	Present	ACSZ01028638	Present	EEQ81413	Present	Present
ribosomal prt S2 (RS2 MOUSE)	Present	SLOPH 2189 Contig 23386	orf_138	ECU07_1700	Present	433	Present	ACSZ01004617	Present	EEQ81939	Present	Present
ribosomal prt SA or P40 (S0) (RSP4 MOUSE)	Present	SLOPH 25 Contig 3518	orf_1010	ECU04_0450	Present	601	Present	ACSZ01008595	Present	EEQ82703	Present	Present
tRNA synthetases			tRNA synthetases
alanyl-tRNA Sase (SYAC yeast)	Present	SLOPH 119 Contig 455	orf_576	ECU02_1490	Present	11	Present	ACSZ01009186	Present	EEQ81555	Present	Present
arginyl-tRNA Sase (SYRC yeast)	Present	SLOPH 135 Contig 7655	orf_1295	ECU08_0550	Present	19	Present	ACSZ01009237	Present	EEQ81733	Present	Present
asparaginyl-tRNA Sase (SYNC yeast)	Present	SLOPH 143 Contig 2268	orf_1201	ECU09_1680	Present	1429	Present	ACSZ01006466	Present	EEQ82596	Present	Present
aspartyl-tRNA Sase (SYD RAT)	Present	SLOPH 147 Contig 5091	orf_2804	ECU06_0790	Present	454	Present	ACSZ01001221	Present	EEQ82147	Present	Present
cysteinyl-tRNA Sase (SYC PYRHO)	Present	SLOPH 250 Contig 5119	orf_3030	ECU08_0490	Present	574	Present	ACSZ01012804	Present	EEQ82856	Present	Present
glutaminyl-tRNA Sase (SYQ LUPLU)	Present	SLOPH 393 Contig 4358	orf_3134	ECU10_1460	Present	306	Present	ACSZ01000033	Present	EEQ82641	Present	Present
glutamyl-tRNA Sase (SYEC yeast)	Present	SLOPH 394 Contig 5574	orf_1707	ECU02_1210	Present	470	Present	ACSZ01005454	Present	EEQ81415	Present	Present
glycyl-tRNA Sase (SYG HUMAN)	Present	SLOPH 404 Contig 3319	orf_2702	ECU10_1790	Present	324	Present	ACSZ01002234	Present	EEQ82088	Present	Present
histidyl-tRNA Sase (SYH BORBU)	Present	SLOPH 424 Contig 27093	Absent	ECU06_0620	Present	667	Present	ACSZ01020769	Present	EEQ82106	Present	Present
isoleucyl-tRNA Sase (SYI HUMAN)	Present	SLOPH 1233 Contig 3102	Frameshift(orf_920; orf_921)	ECU11_1100	Present	509	Present	ACSZ01030833	Present	EEQ82400	Present	Present
leucyl-tRNA Sase (SYLC SCHPO)	Present	SLOPH 1326 Contig 509	orf_3090	ECU06_0280	Present	90	Present	ACSZ01019523	Present	EEQ82449	Present	Present
lysyl-tRNA Sase (SYK CRILO)	Present	SLOPH 1334 Contig 15952	orf_3114	ECU04_0580	Present	166	Present	ACSZ01009534	Present	EEQ82379	Present	Present
methionyl-tRNA Sase (SYM CAEEL)	Present	SLOPH 1348 Contig 3635	orf_2615	ECU11_0890	Present	366	Present	ACSZ01026573	Present	EEQ82257	Present	Present
phenylalanyl-tRNA Sase, α sub (SYFA HUMAN)	Present	SLOPH 1428 Contig 1328	orf_2532	ECU07_1660	Present	433	Present	ACSZ01002919	Present	EEQ83176	Present	Present
phenylalanyl-tRNA Sase, b sub (SYFB MOUSE)	Present	SLOPH 1427 Contig 2267	Frameshift(orf_1210; orf_1211)	ECU04_0900	Present	4	Present	ACSZ01009836	Present	EEQ81893	Present	Present
prolyl-tRNA Sase (SYEP DROME)	Present	SLOPH 1488 Contig 879	orf_2040	ECU02_1360	Present	162	Present	ACSZ01011839	Present	EEQ82524	Present	Present
seryl-tRNA Sase (SYS HELAN)	Present	SLOPH 1639 Contig 19659	orf_1040	ECU04_0750	Present	90	Present	ACSZ01000965	Present	EEQ82737	Present	Present
threonyl- tRNA Sase (SYTC yeast)	Present	SLOPH 1948 Contig 1628	orf_1133	ECU07_1570	Present	219	Present	ACSZ01001992	Present	EEQ82524	Present	Present
tryptophanyl-tRNA Sase (SYW SCHPO)	Present	SLOPH 2006 Contig 428	orf_640	ECU11_0530	Present	326	Present	ACSZ01000682	Present	EEQ82153	Present	Present
tyrosyl-tRNA Sase (SYY HUMAN)	Present	SLOPH 2012 Contig 21101	orf_2584	ECU05_1120	Present	399	Present	ACSZ01000914	Present	EEQ83027	Present	Present
valyl-tRNA Sase (SYV yeast)	Present	SLOPH 2059 Contig 1328	orf_10	ECU04_1140	Present	567	Present	ACSZ01020395	Present	EEQ82274	Present	Present
Recombination and DNA repair			Recombination and DNA repair
ATP-dep DNA helicase (HUS2 SCHPO)	Present	SLOPH 150 Contig 1922	orf_241	ECU07_1130	Present	613	Present	ACSZ01003613	Present	EEQ82903	Present	Present
casein kinase I (HHP2 SCHPO)	Present	SLOPH 184 Contig 5494	orf_513	ECU03_0910	Present	1391	Present	ACSZ01006604	Present	EEQ82997	Present	Present
casein kinase I (KC1A BOVINE)	Present	SLOPH 184 Contig 5494	orf_513	ECU11_1980	Present	326	Present	ACSZ01006604	Present	EEQ82997	Present	Present
chromodomain DNA-Bprt, SNF2/RAD54 fam (CHD2 HUMAN)	Present	SLOPH 1900 Contig 4339	orf_1231	ECU01_0350	Present	1429	Present	ACSZ01013361	Present	EEQ82969	Present	Present
DNA mismatch repair prt, MUTL/HEXB fam (MLH1 HUMAN)	Absent	Absent	Frameshift(orf_1404; orf_1405)	ECU05_0300	Present	601	Present	ACSZ01003394	Present	EEQ83087	Present	Present
DNA mismatch repair prt, MUTL/HEXB fam (HEXB STRPN)	Present	SLOPH 1355 Contig 14434	orf_2437	ECU11_1260	Present	3	Present	ACSZ01029905	Present	EEQ82585	Present	Present
DNA mismatch repair prt, MUTS fam (MSH2 HUMAN)	Present	SLOPH 284 Contig 7543	orf_2653	ECU03_0540	Present	0	Present	ACSZ01002224	Present	EEQ82644	Present	Present
DNA mismatch repair prt, MUTS fam (MSH6 yeast)	Present	SLOPH 2613 Contig 4728	orf_558	ECU10_0710	Present	1037	Present	ACSZ01011468	Present	EEQ81696	Present	Present
DNA repair helicase, RAD3/XPD subfam (RAD3 yeast)	Present	SLOPH 2475 Contig 10633	Frameshift(orf_1797; orf_1798;)	ECU06_0200	Present	90	Present	ACSZ01026573	Present	EEQ82054	Present	Present
DNA repair helicase RAD25 (RA25 yeast)	Present	SLOPH 295 Contig 8426	orf_1685	ECU01_1060	Present	289	Present	ACSZ01008669	Present	EEQ82285	Present	Present
DNA repair prt, RAD4/XPC fam (XPC MOUSE)	Present	SLOPH 301 Contig 4123	orf_2661	ECU01_0450	Absent	N.A.	Present	ACSZ01006857	Present	EEQ82683	Absent	Absent
DNA repair prt, RAD14/XPA fam (XPA XENLA)	Present	SLOPH 296 Contig 4265	orf_1657	ECU10_1170	Absent	N.A.	Present	ACSZ01026164	Absent	N.A.	Absent	Absent
DNA repair prt RAD50 (RA50 yeast)	Present	SLOPH 302 Contig 6198	Frameshift(orf_2331; orf_2332; orf_2333)	ECU07_0610	Present	130	Present	ACSZ01009575	Present	EEQ82874	Present	Present
DNA repair prt, XPF/ERCC4/RAD1 fam (MEI9 DROME)	Present	SLOPH 2220 Contig 1628	orf_3040	ECU08_0760	Present	1391	Present	ACSZ01001914	Present	EEQ82544	Absent	Absent
double-strand break DNA repair prt, MRE11/RAD32 fam (RA32 SCHPO)	Present	SLOPH 2294 Contig 13284	orf_3095	ECU05_1280	Present	604+1228	Present	ACSZ01005577	Present	EEQ81592	Present	Present
exonuclease 1 (EXO1 SCHPO)	Present	SLOPH 2215 Contig 15	orf_2808	ECU11_0760	Present	756, 1437	Present	ACSZ01012796	Present	EEQ82140	Present	Present
exonuclease, put (YSM4 CAEEL)	Present	SLOPH 353 Contig 6038	orf_651	ECU07_0380	Present	3	Present	ACSZ01006641	Present	EEQ82504	Present	Present
recombination and DNA repair prt RAD18 (RA18 SCHPO)	Present	SLOPH 299 Contig 1155	Frameshift(orf_490; orf_491);	ECU07_0390	Present	3	Present	ACSZ01026573	Present	EEQ82679	Present	Present
recombination and DNA repair prt RAD26 (RA26 yeast)	Present	SLOPH 1898 Contig 9031	orf_2484	ECU09_0410	Present	363	Present	ACSZ01013361	Present	EEQ83063	Present	Present
recombination and DNA repair prt SNF2/RAD54 fam (YA83 SCHPO)	Present	SLOPH 1918 Contig 5848	orf_3292	ECU06_0820	Present	1321	Present	ACSZ01000862	Present	EEQ82865	Present	Present
RUVB-like DNA helicase (RUVB MYCLE)	Present	SLOPH 1598 Contig 3093	orf_2682	ECU09_1390	Present	483	Present	ACSZ01003079	Present	EEQ81782	Present	Present
uracyl-DNA glycosylase (UNG HUMAN)	Present	SLOPH 2469 Contig 22509	orf_2787	ECU10_0530	Present	886	Present	ACSZ01009127	Present	EEQ82873	Present	Present
rRNA processing			rRNA processing
ATP-dep RNA helicase (25S maturation), DEAD box fam (SPB4 yeast)	Present	SLOPH 259 Contig 2255	orf_2276	ECU10_0690	Present	26	Present	ACSZ01013819	Present	EEQ81768	Present	Present
ATP-dep RNA helicase (P68-like), DEAD box fam (DBP2 yeast)	Present	SLOPH 262 Contig 2785	orf_2341	ECU08_1080	Present	510	Present	ACSZ01000017	Present	EEQ82394	Present	Present
ATP-dep RNA helicase (25S maturation), put (YA47 SCHPO)	Present	SLOPH 152 Contig 1377	orf_1236	ECU06_1250	Present	51	Present	ACSZ01021621	Present	EEQ81838	Present	Present
ATP-dep RNA helicase (18S maturation), put (YN21 CAEEL)	Present	SLOPH 266 Contig 783	orf_2798	ECU10_0440	Present	508	Present	ACSZ01021621	Present	EEQ82663	Present	Present
belongs to the RNase PH (exosome) fam, put (YBX3 SCHPO)	Absent	Absent	Absent	ECU06_0390	Present	219	Present	ACSZ01002677	Present	EEQ82404	Absent	Absent
belongs to the RNase PH (exosome) fam, put (YG2N yeast)	Present	SLOPH 1655 Contig 2115	orf_2506	ECU10_0270	Present	417	Present	ACSZ01006274	Absent	N.A.	Absent	Absent
component of the 3', 5' exoribonuclease for 3' end formation of 5.8S rRNA (DIS3 yeast)	Present	SLOPH 355 Contig 2049	orf_2868	ECU03_0700	Present	1223, 367	Present	ACSZ01004151	Present	EEQ82259	Present	Present
component of the 3', 5' exoribonuclease for 3' processing of 5.8S rRNA (RNPH CAEEL)	Present	SLOPH 357 Contig 6198	orf_2022	ECU09_0830	Present	231	Present	ACSZ01009170	Present	EEQ81510	Present	Present
fibrillarin (FBR2 yeast)	Present	SLOPH 367 Contig 6144	orf_2260	ECU10_0820	Present	1493	Present	ACSZ01008890	Present	EEQ82607	Present	Present
nucleolar prt (NOP2 yeast)	Present	SLOPH 1394 Contig 3053	orf_592; orf_2375	ECU07_0320	Present	231	Present	ACSZ01021630	Present	EEQ83020	Present	Present
nucleolar prt, pre-18S splicing (NOP5 yeast)	Present	SLOPH 1408 Contig 249	orf_14	ECU04_0820	Present	90	Present	ACSZ01013040	Present	EEQ82389	Present	Present
nucleolar prt, pre-18S splicing (NOP5 yeast)	Present	SLOPH 2203 Contig 12761	orf_14	ECU09_1600	Present	231	Present	ACSZ01013040	Present	EEQ81865	Present	Present
nucleolar prt, NOL1/NOP2 fam (p120 HUMAN)	Present	SLOPH 2672 Contig 970	orf_2375	ECU01_1080	Present	483,1100,1101	Present	ACSZ01009559	Present	EEQ81178	Present	Present
rRNA adenine-N6,N6-dimethylTase (DIM1 yeast)	Present	SLOPH 276 Contig 7363	orf_2820	ECU04_0460	Present	370,233	Present	ACSZ01019990	Present	EEQ82382	Present	Present
rRNA methylTase (SPB1 yeast)	Present	SLOPH 2684 Contig 917	orf_2818	ECU07_1340	Present	543	Present	ACSZ01005658	Present	EEQ82535	Present	Present
small nucleolar prt (GAR1 yeast)	Present	SLOPH 383 Contig 14616	orf_54	ECU01_1360	Present	482	Present	ACSZ01009104	Present	EEQ82161	Present	Present
small nucleolar prt (GAR2 SCHPO)	Present	SLOPH 2162 Contig 5883	orf_2991	ECU03_0730	Present	367	Present	ACSZ01006415	Present	EEQ82229	Present	Present
U3 snoRNP, 18S production (IMP3 yeast)	Present	SLOPH 1600 Contig 1938	orf_2876	ECU05_1320	Present	324	Present	ACSZ01034286	Present	EEQ82768	Present	Present
U3 snoRNP, 18S production (SOF1 yeast)	Present	SLOPH 2063 Contig 10749	orf_1812	ECU02_0240	Present	458	Present	ACSZ01015282	Present	EEQ81855	Present	Present
U3 snoRNP, IMP4-like prt (YEE7 SCHPO)	Present	SLOPH 162 Contig 6143	orf_1007	ECU11_1910	Present	495	Present	ACSZ01016531	Present	EEQ81887	Present	Present
DNA directed DNA polymerases			DNA directed DNA polymerases
DNA pol α, sub A (DPOA SCHPO)	Present	SLOPH 315 Contig 462	Frameshift(orf_810; orf_811; orf_812)	ECU05_0990	Present	1205	Present	ACSZ01002895	Present	EEQ83074	Present	Present
DNA pol α, sub B (DPO2 rat)	Present	SLOPH 2272 Contig 1001	orf_796	ECU10_1080	Present	846	Present	ACSZ01029149	Present	EEQ82664	Present	Present
DNA pol / primase, large sub (PRI2 HUMAN)	Present	SLOPH 2266 Contig 1202	orf_685	ECU05_1210	Present	2761, 251	Present	ACSZ01002059	Present	EEQ82002	Present	Present
DNA pol / primase, small sub (PRI1 MOUSE)	Present	SLOPH 292 Contig 2039	orf_918;orf_919	ECU08_0630	Present	3	Present	ACSZ01014190	Present	EEQ82289	Present	Present
DNA pol d, large sub (DPOD CANAL)	Present	SLOPH 289 Contig 3319	orf_1015	ECU09_0430	Present	433	Present	ACSZ01001710	Present	EEQ82248	Present	Present
DNA pol d, small sub (DPD2 MOUSE)	Present	SLOPH 290 Contig 5883	orf_2014	ECU09_0770	Present	231	Present	ACSZ01012218	Present	EEQ81388	Present	Present
DNA pol d, PCNA (PCNA BRANR)	Present	SLOPH 1487 Contig 8051	orf_2122	ECU05_1030	Present	855	Present	ACSZ01013083	Present	EEQ83080	Present	Present
DNA pol e, cat sub (DPOE SCHPO)	Present	SLOPH 291 Contig 14193	orf_133	ECU10_1210	Present	2918	Present	ACSZ01012428	Present	EEQ83015	Present	Present
DNA replication factors A and C			DNA replication factors A and C
DNA rep factor A, prt 1 (RFA1 SCHPO)	Present	SLOPH 1551 Contig 783	orf_2797	ECU10_0600	Present	1246	Present	ACSZ01011209	Present	EEQ82914	Present	Present
DNA rep factor A, prt 2 (RFA2 HUMAN)	Present	SLOPH 1545 Contig 19062	orf_1086	ECU06_0360	Present	363	Present	ACSZ01004601	Present	EEQ82336	Present	Present
DNA rep factor A, prt 3, w.sim (RFA3 SCHPO)	Absent	Absent	orf_1123	ECU07_0950	Absent	N.A.	Absent	N.A.	Absent	N.A.	Present	Present
DNA rep factor C sub (RFC1 yeast)	Present	SLOPH 306 Contig 3093	orf_1309	ECU05_1530	Present	290	Present	ACSZ01000937	Present	EEQ81783	Present	Present
DNA rep factor C sub (RFC2 yeast)	Present	SLOPH 306 Contig 3093	orf_1402	ECU02_0680	Present	504	Present	ACSZ01008058	Present	EEQ81783	Present	Present
DNA rep factor C sub (RFC3 yeast)	Present	SLOPH 1550 Contig 6008	orf_1422	ECU02_0290	Present	220	Present	ACSZ01008058	Present	EEQ82270	Present	Present
DNA rep factor C sub (AC13 HUMAN)	Present	SLOPH 1550 Contig 6008	orf_1751	ECU10_0780	Present	612	Present	ACSZ01000356	Present	EEQ82270	Present	Present
DNA rep factor C sub (RFC5 yeast)	Present	SLOPH 1547 Contig 3284	orf_2324	ECU09_1330	Present	222	Present	ACSZ01000486	Present	EEQ82348	Present	Present
DNA replication licensing factors, MCM family			DNA replication licensing factors, MCM family
MCM2 (CC19 SCHPO)	Present	SLOPH 308 Contig 1585	orf_2796	ECU04_0850	Present	462	Present	ACSZ01005592	Present	EEQ82387	Present	Present
MCM3 (MCM3 SCHPO)	Present	SLOPH 309 Contig 3618	orf_800	ECU08_0290	Present	1157	Present	ACSZ01000727	Present	EEQ82083	Present	Present
MCM4 (MCM4 SCHPO)	Present	SLOPH 2358 Contig 1329	orf_3223	ECU02_1150	Present	119	Present	ACSZ01005592	Present	EEQ81646	Present	Present
MCM4 (MCM4 DROME)	Present	SLOPH 1341 Contig 5091	orf_589	ECU11_0800	Present	757	Present	ACSZ01004481	Present	EEQ82387	Present	Present
MCM5 (MCM5 yeast)	Present	SLOPH 307 Contig 2464	orf_1356	ECU06_0340	Present	51	Present	ACSZ01000377	Present	EEQ82334	Present	Present
MCM6 (MCM6 MOUSE)	Present	SLOPH 310 Contig 2394	orf_1380	ECU05_0780	Present	348	Present	ACSZ01000489	Present	EEQ81956	Present	Present
MCM7 (MCM7 MOUSE)	Present	SLOPH 2614 Contig 15878	orf_3257	ECU07_0490	Present	458	Present	ACSZ01015247	Present	EEQ81859	Present	Present
MCM7 (MCM7 XENLA)	Present	SLOPH 311 Contig 17579	orf_319	ECU09_1360	Present	27	Present	ACSZ01007793	Present	EEQ81646	Present	Present
tRNA modification			tRNA modification
N2,N2-dimethylguanosine-tRNA methylTase (TRM1 yeast)	Present	SLOPH 2405 Contig 2268	orf_2175	ECU08_1450	Present	704	Present	ACSZ01020293	Present	EEQ82122	Present	Present
tRNA pseudouridylate Sase 1(TRUA METTH)	Present	SLOPH 1522 Contig 2748	orf_3296	ECU11_1610	Present	71	Present	ACSZ01004150	Present	EEQ83104	Present	Present
tRNA pseudouridylate Sase 2 (PSU2 yeast)	Present	SLOPH 2249 Contig 3009	orf_1208	ECU04_0890	Present	713	Present	ACSZ01011851	Present	EEQ81670	Present	Present
tRNA pseudouridylate Sase 2 (TRUB METJA)	Present	SLOPH 1525 Contig 10419	orf_1948	ECU05_1350	Present	339	Present	ACSZ01007892	Absent	N.A.	Present	Present
tRNA (Gm34, Gm37) 2'-O-methyltransferase (EC 2.1.1.34)	Present	SLOPH 232 Contig 428	orf_2534	ECU09_0920	Present	543	Present	ACSZ01005522	Present	EEQ82535	Present	Present
tRNA adenylylTrase (CCA1 yeast)	Present	SLOPH 2407 Contig 13241	orf_214	ECU03_1440	Present	298	Present	ACSZ01020550	Present	EEQ82786	Present	Present
tRNA ribosylTase (TGT DROME)	Present	SLOPH 1534 Contig 25617	orf_3176	ECU06_0310	Present	470	Present	ACSZ01013618	Present	EEQ83057	Present	Present
DNA dependent helicases, ligases, telomerases			DNA dependent helicases, ligases, telomerases
ATP-dept DNA-binding helicase, RAD3/XPD fam (CHL1 yeast)	Present	SLOPH 293 Contig 1697	orf_3240	ECU02_1090	Present	119	Present	ACSZ01013285	Present	EEQ82150	Present	Present
ATP-dept DNA-binding helicase, RAD3/XPD fam (CHL1 yeast)	Present	SLOPH 294 Contig 2850	orf_357	ECU08_1120	Present	129 + 699	Present	ACSZ01020978	Present	EEQ81754	Present	Present
DNA helicase (DNA2 yeast)	Present	SLOPH 282 Contig 2399	orf_2066	ECU09_1800	Present	1388	Present	ACSZ01002622	Present	EEQ82974	Present	Present
DNA ligase (DNL1 MOUSE)	Present	SLOPH 283 Contig 428	Frameshift(orf_405; orf_404; orf_406)	ECU02_1220	Present	980	Present	ACSZ01010095	Present	EEQ82740	Present	Present
origin recognition complex, sub 1 (ORC1 DROME)	Present	SLOPH 192 Contig 10751	orf_1087	ECU03_1030	Present	363	Present	ACSZ01001434	Present	EEQ82509	Present	Present
origin recognition complex, sub 2 (ORC2 ARATH)	Present	SLOPH 2406 Contig 4170	orf_2010	ECU10_1130	Present	509	Present	ACSZ01012368	Present	EEQ83013	Present	Present
telomerase, cat sub (TERT SCHPO)	Present	SLOPH 649 Contig 18813	Frameshift(orf_2498; orf_2497; orf_2499)	ECU09_0310	Present	1388	Present	ACSZ01024645	Present	EEQ82507	Present	Present
Chromosome segregation proteins, SMC family			Chromosome segregation proteins, SMC family
chromosome segregation prt (CUT3 SCHPO)	Present	SLOPH 1909 Contig 5619	orf_18	ECU07_0680	Present	169	Present	ACSZ01001251	Present	EEQ81851	Present	Present
chromosome segregation prt (CUT4 SCHPO)	Present	SLOPH 209 Contig 2898	orf_1504	ECU01_1160	Present	113	Present	ACSZ01008196	Present	EEQ82456	Present	Present
chromosome segregation prt (P115 MYCPN)	Present	SLOPH 210 Contig 3992	orf_998	ECU09_1910	Present	289	Present	ACSZ01004120	Present	EEQ82162	Present	Present
chromosome segregation prt (SMC1 yeast)	Present	SLOPH 1893 Contig 249	Frameshift(orf_1770; orf_1769)	ECU04_0930	Present	1358, 1085	Present	ACSZ01001251	Present	EEQ81851	Present	Present
chromosome segregation prt, put (YDZ2 SCHPO)	Present	SLOPH 1892 Contig 2454	Frameshift(orf_198; orf_197; orf_196; orf_195; orf_194)	ECU11_2000	Present	1454	Present	ACSZ01019931	Present	EEQ82281	Present	Present
Phosphate metabolism			Phosphate metabolism
acid phosphatase (PPAY CAEEL)	Present	SLOPH 423 Contig 3446	orf_2348	ECU07_0180	Present	51	Present	ACSZ01012940	Present	EEQ82556	Present	Present
inorganic pyrophosphatase (IPYR DROME)	Present	SLOPH 1230 Contig 1001	orf_3117	ECU10_0340	Present	854	Present	ACSZ01007660	Present	EEQ82666	Present	Present
inositol polyphosphate-5 phosphatase, put (INP54 yeast)	Present	SLOPH 1231 Contig 11741	orf_3110	ECU10_1370	Absent	N.A.	Present	ACSZ01001266	Present	EEQ81454	Present	Present
involved in polyphosphate metabolism (PHM8 yeast)	Present	SLOPH 1532 Contig 7363	orf_2072;orf_1305;orf_1449;orf_1839	ECU05_1170	Present	119	Present	ACSZ01020970	Present	EEQ81802	Present	Present
polyphosphate synthase, put (VTC4 yeast)	Present	SLOPH 227 Contig 2455	orf_1602	ECU06_1420i	Absent	N.A.	Present	ACSZ01000919	Present	EEQ82235	Present	Present
Amino-acid metabolism			Amino-acid metabolism
asparagine Sase (ASNH METJA)	Present	SLOPH 142 Contig 11206	orf_12	ECU04_0840	Present	1548	Present	ACSZ01003504	Present	EEQ82388	Absent	Absent
deoxyhypusine Sase (DHYS SCHPO)	Present	SLOPH 267 Contig 249	orf_555;orf_1259	ECU09_0910	Present	731	Present	ACSZ01003980	Present	EEQ82437	Present	Present
diphthine Sase (DPH5 yeast)	Present	SLOPH 279 Contig 2195	orf_2802	ECU11_1430	Present	603	Present	ACSZ01000775	Present	EEQ81601	Present	Present
ornithine decarboxylase, w. sim (DCOR yeast)	Absent	Absent	orf_1904 (no EC annotated)	ECU08_0360	Present	298	Absent	N.A.	Present	EEQ82562	Present	Present
Additional from T.hominis annotation
methionine adenosyltransferase	Absent	Absent	orf_3143	Absent
ADP/ATP transporters			ADP/ATP transporters
ADP/ATP carrier protein 1 (TLCA RICPR)	Present	SLOPH 117 Contig 4106	orf_2896	ECU10_0520	Present	886	Present	ACSZ01004527	Present	EEQ82913	Present	Present
ADP/ATP carrier protein 2 (TLCA RICPR)	Present	SLOPH 118 Contig 4106,	orf_2894	ECU10_0540	Present	886	Present	ACSZ01004527	Present	EEQ82057	Present	Present
ADP/ATP carrier protein 3 (TLCA RICPR)	Present	SLOPH 116 Contig 4106,	orf_2860	ECU08_1300	Present	886	Present	ACSZ01004527	Present	EEQ83030	Present	Present
ADP/ATP carrier protein 4 (TLCD RICPR)	Present	SLOPH 115 Contig 2653,	orf_1166	ECU10_0420	Present	N.A.	Present	ACSZ01004527	Present	EEQ82872	Present	Present
plus two additional ADP/ATP carrier protein 4 (TLCD RICPR)		SLOPH 114 Contig 2079, SLOPH 113 Contig 2079
Transcription elongation factors			Transcription elongation factors
transcription elong factor SII (TFS2 SCHPO)	Present	SLOPH 2155 Contig 5883	orf_209	ECU04_0180	Present	298	Present	ACSZ01004497	Present	EEQ82797	Present	Present
transcription elong factor, E2F/DP fam (E2F5 RAT)	Present	SLOPH 1960 Contig 7421	orf_891	ECU02_1350	Present	567	Present	ACSZ01015011	Present	EEQ82730	Present	Present
transcription factor (dimerization partner), E2F/DP fam (TDP DROME)	Present	SLOPH 1959 Contig 5427	orf_3089	ECU06_0260	Present	90	Present	ACSZ01015011	Present	EEQ82450	Present	Present
Sugar transporters			Sugar transporters
glucose transp, type 1 (GTR1 PIG)	Present	SLOPH 1912 Contig 17579	orf_3146;orf_315	ECU07_1100	Present	27	Present	ACSZ01005989	Present	EEQ82906	Present	Present
glucose transp, type 3 (GTR3 CANFA)	Present	SLOPH 1913 Contig 3489	orf_3146;orf_315	ECU04_0210	Present	27	Present	ACSZ01005989	Present	EEQ81815	Present	Present
sugar permease (MALA BACST)	Present	SLOPH 2201 Contig 271	orf_963	ECU11_1870	Present	495	Present	ACSZ01007336	Present	EEQ81977	Present	Present
DNA topoisomerases			DNA topoisomerases
DNA topoisomerase I (TRF5 yeast)	Absent	Absent	orf_1699;orf_1461	ECU06_1520	Present	27	Present	ACSZ01017984	Absent	N.A.	Present	Present
DNA topoisomerase II (TOP2 SCHPO)	Present	SLOPH 312 Contig 5046	orf_1646	ECU04_0350	Present	417	Present	ACSZ01008266	Present	EEQ83150	Present	Present
DNA topoisomerase III (TOP3 SCHPO)	Present	SLOPH 313 Contig 806	orf_187	ECU04_1070	Present	51	Present	ACSZ01002203	Present	EEQ81736	Present	Present
Nitrogen and sulfur metabolism			Nitrogen and sulfur metabolism
NGG1-interacting factor 3 (NIF3 yeast)	Present	SLOPH 1389 Contig 3824	orf_2183	ECU07_0100	Present	319	Present	ACSZ01013819	Present	EEQ82570	Absent	Absent
NIFS-like prt (NFS1 CANAL)	Present	SLOPH 249 Contig 6038	orf_306	ECU11_1770	Present	495	Present	ACSZ01001392	Present	EEQ82825	Present	Present
NIFU-like prt (NIFU RICPR)	Present	SLOPH 1232 Contig 1001	orf_2800	ECU01_0510	Present	348	Present	ACSZ01000242	Absent	N.A.	Present	Present
Polynucleotide degradation			Polynucleotide degradation
deoxyribonuclease, TATD fam (TATD ECOLI)	Present	SLOPH 1936 Contig 1601	orf_134	ECU03_0200	Present	18	Present	ACSZ01004431	Present	EEQ81679	Present	Present
ribonuclease, HII fam (YNH2 yeast)	Present	SLOPH 1559 Contig 882	orf_939	ECU03_0670	Present	1067,1032	Present	ACSZ01007376	Present	EEQ81464	Present	Present
tRNA processing			tRNA processing
ribonuclease P sub (RP29 HUMAN)	Present	SLOPH 2442 Contig 4360	Absent	ECU07_1650	Present	433	Present	ACSZ01007677	Present	EEQ81663	Present	Present
tRNA intron endonuclease (ENDA METTH	Present	SLOPH 2005 Contig 15447	orf_2723	ECU03_0920	Present	515	Present	ACSZ01016701	Absent	N.A.	Present	Present
Origin Recognition Complex			Origin Recognition Complex
origin recognition complex, sub 1 (ORC1 DROME)	Present	SLOPH 192 Contig 10751	orf_1087	ECU03_1030	Present	363	Present	ACSZ01001434	Absent	N.A.	Present	Present
origin recognition complex, sub 2 (ORC2 ARATH)	Present	SLOPH 2406 Contig 4170	orf_2010	ECU10_1130	Present	509	Present	ACSZ01012368	Present	EEQ82509	Present	Present
Glycerol phosphate shuttle			Glycerol phosphate shuttle
glycerol-3-P DHase A	Present	SLOPH 1386 Contig 2931	orf_1344	ECU05_0270	Present	162	Present	ACSZ01023525	Present	EEQ81289	Present	Present
glycerol-3-P DHase A (Mitochondrial)	Present	SLOPH 1357 Contig 9254	orf_1639	ECU10_0870	Present	70, 470	Present	ACSZ01010455	Present	EEQ82606	Absent	Absent
tRNA synthesis			tRNA synthesis
RNA pol III, 160K sub (RPC1 yeast)	Present	SLOPH 2428 Contig 1573	Frameshift(orf_273; orf_271; orf_272)	ECU07_0090	Present	306	Present	ACSZ01003629	Present	EEQ82212	Present	Present
RNA pol III, 130K sub (RPC2 SCHPO)	Present	SLOPH 2615 Contig 970	orf_1989	ECU11_0370	Present	836	Present	ACSZ01003782	Present	EEQ83178	Present	Present
RNA pol III, 34K sub (RPC6 yeast)	Present	SLOPH 2262 Contig 7731	orf_3268	ECU10_0210	Present	705	Present	ACSZ01001210	Present	EEQ82654	Present	Present
RNA pol III, 25K sub (RPCY yeast)	Present	SLOPH 321 Contig 9031	orf_1676	ECU08_0650	Present	1320	Present	ACSZ01016774	Present	EEQ82292	Absent	Absent
RNA pol III, 12.5K sub (RPCZ yeast)	Present	SLOPH 2235 Contig 679	orf_386	ECU03_0490	Present	214	Present	ACSZ01029447	Present	EEQ82860	Present	Present
RNA pol I and III, 14K sub (RPC9 HUMAN)	Present	SLOPH 2730 Contig 7858	orf_1633	ECU11_0590	Present	755	Present	ACSZ01010310	Absent	N.A.	Present	Present
transcrption init factor TFIIIB, 70K sub (TF3B yeast)	Present	SLOPH 1964 Contig 4828	orf_1474	ECU05_0500	Present	212	Present	ACSZ01016127	Present	EEQ82920	Present	Present
Protein kinases			Protein kinases
casein kinase II, α sub (KC2A CAEEL)	Present	SLOPH 2154 Contig 5883	orf_3232	ECU05_1510	Present	210	Present	ACSZ01000363	Present	EEQ82521	Absent	Present
casein kinase II, b sub KC2B DROME)	Present	SLOPH 2125 Contig 5883	orf_1658	ECU10_1200i	Present	926,509	Absent	N.A.	Present	EEQ83016	Present	Present
CDC 68 (Start, general transcription) (CC68 yeast)	Present	SLOPH 1957 Contig 5133	orf_3077	ECU03_0420	Present	18	Present	ACSZ01010937	Present	EEQ82619	Present	Present
cell cycle protein kinase CDC2 (CC2A ANTMA)	Present	SLOPH 198 Contig 14616	orf_1342	ECU11_0960	Present	2979	Present	ACSZ01008289	Present	EEQ81692	Present	Present
cell cycle protein kinase CDK2 (CDK2 CARAU)	Present	SLOPH 248 Contig 15878	orf_3261	ECU08_1920	Present	584	Present	ACSZ01000363	Present	EEQ82656	Present	Present
cell cycle protein kinase, CDC2/CDKX subfam (CC22 MEDSA)	Present	SLOPH 199 Contig 4270	orf_1919	ECU08_0230	Present	1391	Present	ACSZ01000363	Present	EEQ82567	Present	Present
cell cycle protein kinase, CDC2/CDKX subfam (CDKA HUMAN)	Present	SLOPH 248 Contig 15878	orf_326;orf_161	ECU11_1290	Present	2313	Present	ACSZ01003702	Present	EEQ82656	Present	Present
cell cycle protein kinase, CDC2/CDKX subfam (CDK9 CAEEL)	Present	SLOPH 2209 Contig 12761	orf_161	ECU08_1790	Present	712	Present	ACSZ01003702	Present	EEQ83117	Present	Present
cell cycle protein kinase, CDC7 subfam (HSK1 SCHPO)2	Present	SLOPH 1627 Contig 2850	orf_1705	ECU08_1960	Present	584	Present	ACSZ01010964	Present	EEQ83137	Present	Present
cell cycle protein kinase, CDC7 subfam (HSK1 SCHPO)2	Present	SLOPH 1627 Contig 2850	orf_1705	ECU10_0120	Present	584	Present	ACSZ01010964	Present	EEQ83137	Present	Present
cyclin-dep ser/thr protein kinase (KI28 yeast)	Present	SLOPH 1504 Contig 455	orf_2235	ECU02_1450	Present	27	Present	ACSZ01000363	Present	EEQ82146	Present	Present
mitogen-activated protein kinase (MK16 yeast)	Present	SLOPH 2478 Contig 15878	orf_2264	ECU10_0830	Present	1493	Present	ACSZ01023058	Present	EEQ82609	Present	Present
ser/thr protein kinase (CHK1 SCHPO)	Present	SLOPH 201 Contig 45	orf_2893	ECU03_0620	Present	369	Present	ACSZ01006490	Present	EEQ82030	Present	Present
ser/thr protein kinase (MRK1 yeast)	Present	SLOPH 1626 Contig 2745	orf_121	ECU07_1270	Present	217	Present	ACSZ01007502	Present	EEQ82530	Present	Present
ser/thr protein kinase (PKPA PHYB)	Present	SLOPH 1628 Contig 4090	Frameshift(orf_295; orf_293; orf_294)	ECU05_0630	Present	894	Present	ACSZ01010299	Present	EEQ82375	Present	Present
ser/thr protein kinase (SPK1 yeast)	Present	SLOPH 2367 Contig 16576	orf_1320	ECU02_0550	Present	51	Present	ACSZ01004983	Present	EEQ81993	Present	Present
ser/thr protein kinase (WEE1 XENLA)	Present	SLOPH 1507 Contig 6083	orf_1320	ECU08_1620	Present	3	Present	ACSZ01004983	Present	EEQ81314	Present	Present
ser/thr/tyr protein kinase (IPL1 yeast)	Present	SLOPH 2306 Contig 13259	orf_219	ECU07_0360	Present	51	Present	ACSZ01005542	Present	EEQ82427	Present	Present
thr/tyr protein kinase (MPS1 yeast)	Present	SLOPH 1486 Contig 739	orf_1432	ECU02_0510	Present	219	Present	ACSZ01006743	Present	EEQ81514	Present	Present
Transcription initiation factors			Transcription initiation factors
TFIIA, g sub (T2AG ARATH)	Present	SLOPH 2441 Contig 1203	orf_2138	ECU02_0450	Present	377	Present	ACSZ01008064	Present	EEQ81992	Present	Present
TFIIB (TF2B XENLA)	Present	SLOPH 1966 Contig 3500	orf_2853	ECU06_1100	Present	106	Present	ACSZ01023265	Present	EEQ82889	Present	Present
TFIIB-related prt (SS72 yeast)	Absent	Absent	Absent	ECU06_0840	Present	211	Present	ACSZ01003632	Present	EEQ82863	Absent	Absent
TFIID-1, TBP (TF2D ACACA)	Present	SLOPH 1968 Contig 8426	orf_429	ECU04_1440	Present	27	Present	ACSZ01009059	Present	EEQ81295	Present	Present
TFIID, 150K sub (T2D2 DROME)	Present	SLOPH 2388 Contig 4506	orf_2539	ECU09_0090	Present	233	Present	ACSZ01012984	Present	EEQ82172	Present	Present
TFIID, 111K sub (T111 SCHPO)	Present	SLOPH 2461 Contig 11729	orf_2146	ECU10_0760	Present	669	Present	ACSZ01010684	Present	EEQ82613	Present	Present
TFIID, 72K sub (T2D4 SCHPO)	Present	SLOPH 1969 Contig 2715	orf_2600	ECU11_1750	Present	324	Present	ACSZ01007608	Present	EEQ81798	Present	Present
TFIID, 70K sub (T2D5 yeast)	Present	SLOPH 2444 Contig 1894	orf_437	ECU10_1120	Present	926	Present	ACSZ01014825	Present	EEQ81386	Present	Present
TFIID, 30K sub (T2D8 HUMAN)	Present	SLOPH 1973 Contig 879	orf_2044	ECU11_0830	Present	757	Present	ACSZ01034199	Present	EEQ81515	Present	Present
TFIID, 28K sub (T2D9 HUMAN)	Present	SLOPH 1971 Contig 14718	orf_183	ECU02_1250	Present	214	Present	ACSZ01017297	Present	EEQ81624	Present	Present
TFIID, 18K sub (T2DB yeast)	Present	SLOPH 1970 Contig 11206	orf_1721	ECU04_0950	Present	906	Present	ACSZ01021903	Absent	N.A.	Present	Present
TFIIE, α sub (T2EA HUMAN)	Present	SLOPH 2707 Contig 5883	orf_2266	ECU07_0220	Present	51	Present	ACSZ01007440	Present	EEQ83166	Present	Present
TFIIE, b sub (T2EB HUMAN)	Present	SLOPH 2451 Contig 10904	orf_1162	ECU06_0350	Present	470	Present	ACSZ01004601	Present	EEQ82335	Present	Present
TFIIF, b sub (T2FB HUMAN)	Present	SLOPH 1965 Contig 2779	Absent	ECU02_0780	Present	298	Present	ACSZ01012762	Present	EEQ83154	Present	Present
TFIIF, small sub, put (YD67 SCHPO)	Present	SLOPH 2077 Contig 15	orf_727	ECU03_1600	Present	470	Present	ACSZ01003733	Present	EEQ83056	Present	Present
TFIIH, Tfb sub (MAT1 HUMAN)	Present	SLOPH 1340 Contig 6587	orf_2664	ECU11_0220	Present	171	Present	ACSZ01009264	Present	EEQ83166	Present	Present
transcription init factor (SPT4 HUMAN)	Absent	Absent	orf_880	ECU08_1660	Present	51	Present	ACSZ01029026	Absent	N.A.	Present	Present
transcription init factor, put (YAG5 SCHPO) ---TAF9	Absent	Absent	orf_758	ECU01_1330	Present	369	Present	ACSZ01020674	Absent	N.A.	Present	Present
Cell growth and cell polarity			Cell growth and cell polarity
calcineurin, b sub (CALB NAEGR)	Present	SLOPH 169 Contig 24689	orf_235	ECU08_0160	Present	567	Present	ACSZ01031642	Present	EEQ82719	Present	Present
calcium-Bprt, recoverin subfam (NCS1 yeast)	Present	SLOPH 173 Contig 3850	orf_1907	ECU04_0810	Present	230, 353	Present	ACSZ01015481	Present	EEQ81204	Present	Present
GTP-Bprt, GTP1/OBG fam (DRG1 XENLA)	Present	SLOPH 410 Contig 24689	orf_563	ECU05_0410i	Present	11	Present	ACSZ01017387	Present	EEQ81986	Present	Present
GTP-Bprt, GTP1/OBG fam (DRG2 HUMAN)	Present	SLOPH 270 Contig 9572	orf_318	ECU08_1270	Present	11	Present	ACSZ01017387	Present	EEQ82356	Present	Present
GTP-Bprt, GTP1/OBG fam (FEOB METJA)	Present	SLOPH 2199 Contig 271	orf_362	ECU05_0080	Present	1205	Present	ACSZ01001714	Present	EEQ82631	Present	Absent
involved in plasmid maintenance, respiration and cell proliferation (SMP2 yeast)	Present	SLOPH 1494 Contig 28527	orf_2165	ECU02_0200	Present	792	Present	ACSZ01007467	Present	EEQ81584	Present	Present
RAS-related GTP-Bprt (RAC1 CAEEL)	Present	SLOPH 1541 Contig 2880	orf_3115	ECU03_1560	Present	470	Present	ACSZ01004320	Present	EEQ83058	Present	Present
ser/thr protein kinase (KIN1 SCHPO)	Present	SLOPH 2367 Contig 16576	orf_521	ECU03_0980	Present	363	Present	ACSZ01007519	Present	EEQ82018	Present	Present
required for normal growth,SUA5/YRDC/YC10/YWLC fam (YWLC BACSU)	Present	SLOPH 2452 Contig 1621	orf_1433	ECU09_1610	Absent	N.A.	Present	ACSZ01021383	Present	EEQ81864	Present	Present
suppressor of temperature-sensitive growth of yeast MRP1 mutants (SOH1 yeast)	Present	SLOPH 2693 Contig 446	orf_2013	ECU11_0360	Present	401	Present	ACSZ01031897	Absent	N.A.	Present	Present
suppressor of BEM1/BUD5 (BE46 SCHPO)	Present	SLOPH 2454 Contig 1001	orf_815	ECU09_0730	Absent	N.A.	Absent	N.A.	Present	EEQ81636.	Absent	Absent
Deoxyribonucleotide metabolism			Deoxyribonucleotide metabolism
cytidine and dCMPdeaminase (TAD2 yeast)	Present	SLOPH 251 Contig 16	orf_1668	ECU09_1960	Present	1060	Present	ACSZ01017751	Absent	N.A.	Present	Present
deoxyuridine 5'-triP nucleotidohydrolase (DUT CHVP1)	Present	SLOPH 328 Contig 2254	orf_894;orf_2102	ECU05_0280	Absent	N.A.	Present	ACSZ01010100	Absent	N.A.	Present	Present
deoxyuridine 5'-triP nucleotidohydrolase (DUT yeast)	Present	SLOPH 329 Contig 2399	orf_2069	ECU06_0430	Present	1102	Present	ACSZ01012696	Present	EEQ82407	Present	Present
glutaredoxin (GLRX ORYZA)	Absent	Absent	Absent	ECU08_1380	Absent	N.A.	Absent	N.A.	Absent	N.A.	Present	Absent
glutaredoxin (GLR2 SCHPO)	Present	SLOPH 396 Contig 6161	orf_526;orf_2185	ECU09_1375	Present	51	Present	ACSZ01025823	Absent	N.A.	Present	Present
ribonucleoside-diP RDase, large sub (RIR1 CAEEL)	Present	SLOPH 1561 Contig 2743	Absent	ECU10_0920	Present	669	Present	ACSZ01001948	Present	EEQ82027	Present	Present
ribonucleoside-diP RDase, small sub (RIR2 BRARE)	Present	SLOPH 1562 Contig 3081	orf_2610	ECU06_0730	Present	433	Present	ACSZ01003772	Present	EEQ81761	Present	Present
thymidine kinase (KITH ENCCU)	Present	SLOPH 1951 Contig 17579	Absent	ECU01_0740	Present	433	Present	ACSZ01009877	Present	EEQ82391	Present	Present
thymidylate Sase (TYSY ENCCU)2	Present	SLOPH 1953 Contig 5388	orf_1340	ECU01_0180	Absent	N.A.	Absent	N.A.	Absent	N.A.	Present	Present
thymidylate Sase (TYSY ENCCU)2	Present	as above SLOPH 1953 Contig 5388	Absent	ECU01_1430	Absent	N.A.	Absent	N.A.	Absent	N.A.	Present	Present
thymidylate Sase (TYSY ENCCU)2	Present	as above SLOPH 1953 Contig 5388	Absent	ECU08_0090	Absent	N.A.	Absent	N.A.	Absent	N.A.	Present	Present
C-compound and carbohydrate metabolism			C-compound and carbohydrate metabolism
a-1,2-mannosyl Tase, KTR fam (YUR1 yeast)	Present	SLOPH 402 Contig 1328	orf_2626	ECU04_1130	Present	559	Present	ACSZ01005396	Present	EEQ81558	Present	Present
acetyl-CoA Sase (ACS1 yeast)	Present	SLOPH 99 Contig 4675	orf_2222	ECU05_0310	Present	495	Present	ACSZ01001491	Present	EEQ82078	Absent	Absent
acidic endochitinase (CHIP BETVU)	Present	SLOPH 336 Contig 3284	orf_612	ECU09_1320	Present	222	Present	ACSZ01001708	Absent	N.A.	Present	Present
aldose RDase (ALDR MOUSE)	Present	SLOPH 121 Contig 8939	orf_395	ECU01_0970	Present	298	Present	ACSZ01004539	Present	EEQ82039	Absent	Absent
chitin synthase 1 (CHS1 CRYNE)	Present	SLOPH 202 Contig 2744	orf_1704	ECU01_1390	Present	1194, 613, 1309	Present	ACSZ01012616	Present	EEQ83041	Present	Present
glucosamine-P N-acetylTase (GNA1 CAEEL)	Present	SLOPH 2164 Contig 5883	orf_1075	ECU07_1760	Present	1219	Present	ACSZ01007968	Present	EEQ82297	Present	Present
glucosamine-fructose-6-P aminoTase (GFA2 HUMAN)	Present	SLOPH 390 Contig 2745	orf_122	ECU07_1280	Present	217	Present	ACSZ01006195	Present	EEQ82531	Present	Present
phosphoacetylglucosamine mutase (PCM1 SCHPO)	Present	SLOPH 2332 Contig 1584	orf_1321	ECU01_0650	Present	347	Present	ACSZ01001961	Present	EEQ82941	Present	Present
UDP-N-acetylglucosamine pyrophosphorylase (UAP1 yeast)	Absent	Absent	orf_1437	ECU11_1780	Present	496	Present	ACSZ01012897	Present	EEQ82340	Present	Present
Meiosis			Meiosis
Meiotic Recombination protein Rec 12	Present	SLOPH 1485 Contig 1155	orf_2627	ECU04_1110	Present	273	Present	ACSZ01028283	Present	EEQ81557	Absent	Absent
Double-Strand break DNA repair Protein	Present	SLOPH 2294 Contig 13284	orf_3095	ECU05_1280	Present	604	Present	ACSZ01005577	Present	EEQ81592	Present	Present
RAD50-like DNA repair protein	Present	SLOPH 302 Contig 6198	Frameshift(orf_2331; orf_2332; orf_2333)	ECU07_0610i	Present	GenBank	Present	ACSZ01009575	Present	EEQ82874	Present	Present
Protein to the XPF/ERCC4/RAD1 Family	Present	SLOPH 2220 Contig 1628	orf_3040	ECU08_0760	Present	1391	Present	ACSZ01001914	Present	EEQ82544	Absent	Absent
PHD-finger	Present	SLOPH 1425 Contig 486	orf_2997	ECU02_0890	Present	366	Present	ACSZ01005855	Present	EEQ82031	Absent	Absent
similarity to Hypothetical protein YA53_Schpo	Present	SLOPH 1362 Contig 4057	orf_475	ECU10_1600	Present	513	Absent	N.A.	Present	EEQ81489	Present	Present
DNA repair and recombination protein	Present	SLOPH 1538 Contig 458	orf_2540	ECU09_0930	Present	232	Present	ACSZ01014826	Present	EEQ82846	Absent	Absent
DNA repair protein RAD51	Present	SLOPH 303 Contig 6595	orf_2061	ECU11_0820	Present	757	Present	ACSZ01002434	Present	EEQ82810	Present	Present
DNA Mismatch repair protein	Present	SLOPH 284 Contig 7543	orf_2655	ECU03_0540	Present	0	Present	ACSZ01002224	Present	EEQ82644	Present	Present
DNA Mismatch repair protein of the MUTS family	Present	SLOPH 2613 Contig 4728	orf_558;orf_2653;orf_1300;orf_2654	ECU10_0710	Present	1037	Present	ACSZ01011468	Present	EEQ81696	Present	Present
DNA mismatch repair protein of the MUTL/HEXB family	Absent	Absent	frameshift(orf_1404; orf_1405);	ECU05_0300	Present	601	Present	ACSZ01003394	Present	EEQ83087	Present	Present
DNA mismatch repair protein of the MUTL/HEXB family	Present	SLOPH 489 Contig 10849	orf_2437	ECU11_1260	Present	3	Present	ACSZ01029905	Present	EEQ82585	Present	Present
Chromosome segregation protein	Present	SLOPH 1893 Contig 249	Frameshift: orf_1770; orf_1769;);	ECU04_0930	Present	1358	Present	ACSZ01001251	Present	EEQ81851	Present	Present
GPI-anchor biosynthesis protein	Present	SLOPH 2303 Contig 24087	Absent	ECU09_1210	Present	289	Present	ACSZ01001506	Present	EEQ81971	Present	Absent
Chromosome segregation protein	Present	SLOPH 1909 Contig 5619	orf_18	ECU07_0680	Present	169	Present	ACSZ01001251	Present	EEQ81851	Present	Present
Nuclear protein of the SMC family	Present	SLOPH 1892 Contig 2454	Frameshift(orf_198; orf_197; orf_196; orf_195; orf_194);	ECU11_2000	Present	1454	Present	ACSZ01019931	Present	EEQ82281	Present	Present
RAD18-Like recombination and DNA repair protein	Present	SLOPH 299 Contig 1155	Frameshift(orf_490; orf_491);	ECU07_0390	Present	3	Present	ACSZ01017261	Present	EEQ82679	Present	Present
Rad21 / Rec8 like protein	Present	SLOPH 1705 Contig 783	Absent	ECU04_1370	Present	400	Absent	N.A.	Present	EEQ81701	Present	Present
